# Supplementary material
Source: ML conference proceedings conference paper supplement (https://openreview.net/forum?id=YadmOcMC9aa)
Supplement: supplementary_material [file attachment]

## 1 Implementation Details for Pixel-based Experiments

| Hyperparameter                                               | Value                                  |
|--------------------------------------------------------------|----------------------------------------|
| Augmentation                                                 | Random Translate                       |
| Observation size                                             | (100, 100)                             |
| Augmented size                                               | (108, 108)                             |
| Replay buffer size                                           | 100000                                 |
| Initial steps                                                | 10000                                  |
| Training environment steps                                   | 1.5e6 pendulum swingup<br>2.5e6 others |
| Batch size                                                   | 128                                    |
| Stacked frames                                               | 2 pendulum swingup<br>3 others         |
| Action repeat                                                | 2 walker run, hopper hop<br>4 others   |
| Camera id                                                    | 2 quadruped, walk<br>0 others          |
| Evaluation episode length                                    | 10                                     |
| Hidden units (MLP)                                           | 1024                                   |
| Number of layers (MLP)                                       | 2                                      |
| Optimizer                                                    | Adam                                   |
| $(\beta_1, \beta_2) \rightarrow (f_{CNN}, \pi_\psi, Q_\phi)$ | (.9, .999)                             |
| $(\beta_1, \beta_2) \rightarrow (\alpha)$                    | (.5, .999)                             |
| Learning Rate $(\pi_\psi, Q_\phi)$                           | $2e - 4$                               |
| Learning Rate $(f_{CNN})$                                    | $1e - 3$                               |
| Learning Rate $(\alpha)$                                     | $1e - 4$                               |
| Critic target update frequency                               | 2                                      |
| Critic EMA $\tau$                                            | 0.01                                   |
| Encoder EMA $\tau$                                           | 0.05                                   |
| Convolutional layers                                         | 4                                      |
| Number of CNN filters                                        | 32                                     |
| Latent dimension                                             | 64                                     |
| Non-linearity                                                | ReLU                                   |
| Discount $\gamma$                                            | 0.99                                   |
| Initial Temperature                                          | 0.1                                    |

## 2 Implementation Details for State-based Motivation Experiments

| Hyperparameter                                               | Value                              |
|--------------------------------------------------------------|------------------------------------|
| Replay buffer size                                           | 2000000                            |
| Initial steps                                                | 5000                               |
| Batch size                                                   | 1024                               |
| Stacked frames                                               | 4 Flare, Stack SAC;<br>1 otherwise |
| Action repeat                                                | 1                                  |
| Evaluation episode length                                    | 10                                 |
| Hidden units                                                 | 1024                               |
| Number of layers                                             | 2                                  |
| Optimizer                                                    | Adam                               |
| $(\beta_1, \beta_2) \rightarrow (f_{CNN}, \pi_\psi, Q_\phi)$ | (.9, .999)                         |
| $(\beta_1, \beta_2) \rightarrow (\alpha)$                    | (.9, .999)                         |
| Learning Rate $(\pi_\psi, Q_\phi)$                           | $1e - 4$                           |
| Learning Rate $(\alpha)$                                     | $1e - 4$                           |
| Critic target update frequency                               | 2                                  |
| Critic EMA $\tau$                                            | 0.01                               |
| Non-linearity                                                | ReLU                               |
| Discount $\gamma$                                            | 0.99                               |
| Initial Temperature                                          | 0.1                                |

### 3 FLARE vs RAD CNN Activation

As shown in Figure 1, FLARE activations focus more on parts of the agent that are in charge of controlling balance and speed, such as its legs.

### 4 Interpreting FLARE from a Two-stream Prospective

Let  $f_{\text{CNN}}$  and  $o'_t$  be the pixel encoder and the augmented observation in Flare. Then,  $z_t = f_{\text{CNN}}(o'_t)$  denotes the latent encoding for a frame at time  $t$ . By computing the latent flow  $\delta_t = z_t - z_{t-1}$ , Flare essentially approximates  $\frac{\partial z_t}{\partial t}$  via backward finite difference. Then following chain rule, we have

$$\frac{\partial z}{\partial t} = \frac{\partial z}{\partial o'} \cdot \frac{\partial o'}{\partial t} = \frac{f_{\text{CNN}}(o')}{\partial o'} \cdot \text{dense optical flow}$$

indicating that Flare eventually uses dense optical flow by propagating it through the derivative of the trained encoder. While the two-stream architecture trains a spatial stream CNN from RGB channels and a temporal stream from optical flow separately, Flare can be interpreted as training one spatial stream encoder from the RL objective and approximate the temporal stream encoder with its derivative.

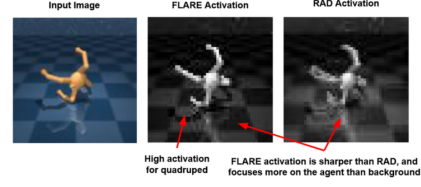

Figure 1: FLARE vs RAD CNN feature activation map.

### 5 Compare Flare with DQN Variants on Atari

Table 1: Evaluation on 8 benchmark Atari games at 100M training steps over 5 seeds.  $\dagger$  directly taken from DQN Zoo repository and the rest are collected from our experiments.

|           | FLARE                    | RAINBOW                  | RAINBOW $^\dagger$       |
|-----------|--------------------------|--------------------------|--------------------------|
| ASSAULT   | 12724 $\pm$ 1107         | <b>15229</b> $\pm$ 2061  | 13194 $\pm$ 4348         |
| BREAKOUT  | 345 $\pm$ 22             | 280 $\pm$ 18             | 366 $\pm$ 20             |
| BERZERK   | <b>2049</b> $\pm$ 421    | 1636 $\pm$ 598           | 3151 $\pm$ 537           |
| DEFENDER  | <b>86982</b> $\pm$ 29214 | 44694 $\pm$ 3984         | 52419 $\pm$ 4481         |
| MONTEZUMA | <b>1668</b> $\pm$ 1055   | 900 $\pm$ 807            | 80 $\pm$ 160             |
| SEAQUEST  | 13901 $\pm$ 8085         | <b>24090</b> $\pm$ 12474 | 5838 $\pm$ 2450          |
| PHOENIX   | 60974 $\pm$ 18044        | 16992 $\pm$ 3295         | <b>82234</b> $\pm$ 33388 |
| TUTANKHAM | <b>248</b> $\pm$ 20      | <b>247</b> $\pm$ 11      | 214 $\pm$ 24             |
|           | PRIORITIZED $^\dagger$   | QR DQN $^\dagger$        | IQN $^\dagger$           |
| ASSAULT   | 10163 $\pm$ 1558         | 10215 $\pm$ 1255         | 11903 $\pm$ 1251         |
| BREAKOUT  | 359 $\pm$ 33             | 450 $\pm$ 29             | <b>492</b> $\pm$ 86      |
| BERZERK   | 986 $\pm$ 98             | 896 $\pm$ 98             | 946 $\pm$ 48             |
| DEFENDER  | 13750 $\pm$ 4182         | 32320 $\pm$ 8997         | 33767 $\pm$ 3643         |
| MONTEZUMA | 0 $\pm$ 0                | 0 $\pm$ 0                | 0 $\pm$ 0                |
| SEAQUEST  | 7436 $\pm$ 1790          | 14864 $\pm$ 3625         | 16866 $\pm$ 4539         |
| PHOENIX   | 10667 $\pm$ 3142         | 41866 $\pm$ 3673         | 35586 $\pm$ 3510         |
| TUTANKHAM | 168 $\pm$ 22             | 171 $\pm$ 30             | 216 $\pm$ 34             |

Table 1 compares Flare with Rainbow, Prioritized Experience Replay, QR DQN and IQN.
